# Supplementary material for: Biorefining of marine macroalgal biomass for production of biofuel and commodity chemicals
Source: Royal Society of Chemistry journal article supplement (doi:10.1039/c4gc02532f), 2015-01-01
Supplement: c4gc02532f3.pdf [file c4gc02532f3.pdf]

**Supplementary Table 1** Optimization of enzymatic hydrolysis of cellulose obtained from *Gelidiella acerosa* and whatman filter paper (WFP) cellulose

| Optimization of enzyme dosage     |                         |                      |                                              |                       |         |         |         |
|-----------------------------------|-------------------------|----------------------|----------------------------------------------|-----------------------|---------|---------|---------|
| Substrate                         | Enzyme                  | Temperature and time |                                              | Reducing sugar (mg/g) |         |         |         |
| Cellulose                         | Cellulase 22086 (v/v)   | 45 °C & 24 h         |                                              |                       |         |         |         |
|                                   | 1%                      |                      |                                              | 340±6.3               |         |         |         |
|                                   | 2%                      |                      |                                              | 840±5.2               |         |         |         |
|                                   | 5%                      |                      |                                              | 785±5.8               |         |         |         |
| Optimization of hydrolysis period |                         |                      |                                              |                       |         |         |         |
| Substrate                         | Enzyme                  | Temperature          | Reducing sugar (mg/g) over hydrolysis period |                       |         |         |         |
| Cellulose                         | Cellulase 22086 (2%v/v) | 45 °C                | 12 h                                         | 24 h                  | 36 h    | 48 h    | 60 h    |
|                                   |                         |                      | 403±5.5                                      | 849±4.1               | 920±5.0 | 810±3.9 | NS      |
| WFP                               |                         |                      | 529±5.9                                      | 607±6.9               | 807±4.9 | 865±5.9 | 938±4.9 |

WFP- Whatmann Filter Paper Cellulose, NS- not studied
