# Supplementary figures and images for: Biorefining of marine macroalgal biomass for production of biofuel and commodity chemicals
Source: Royal Society of Chemistry journal article supplement (doi:10.1039/c4gc02532f), 2015-01-01

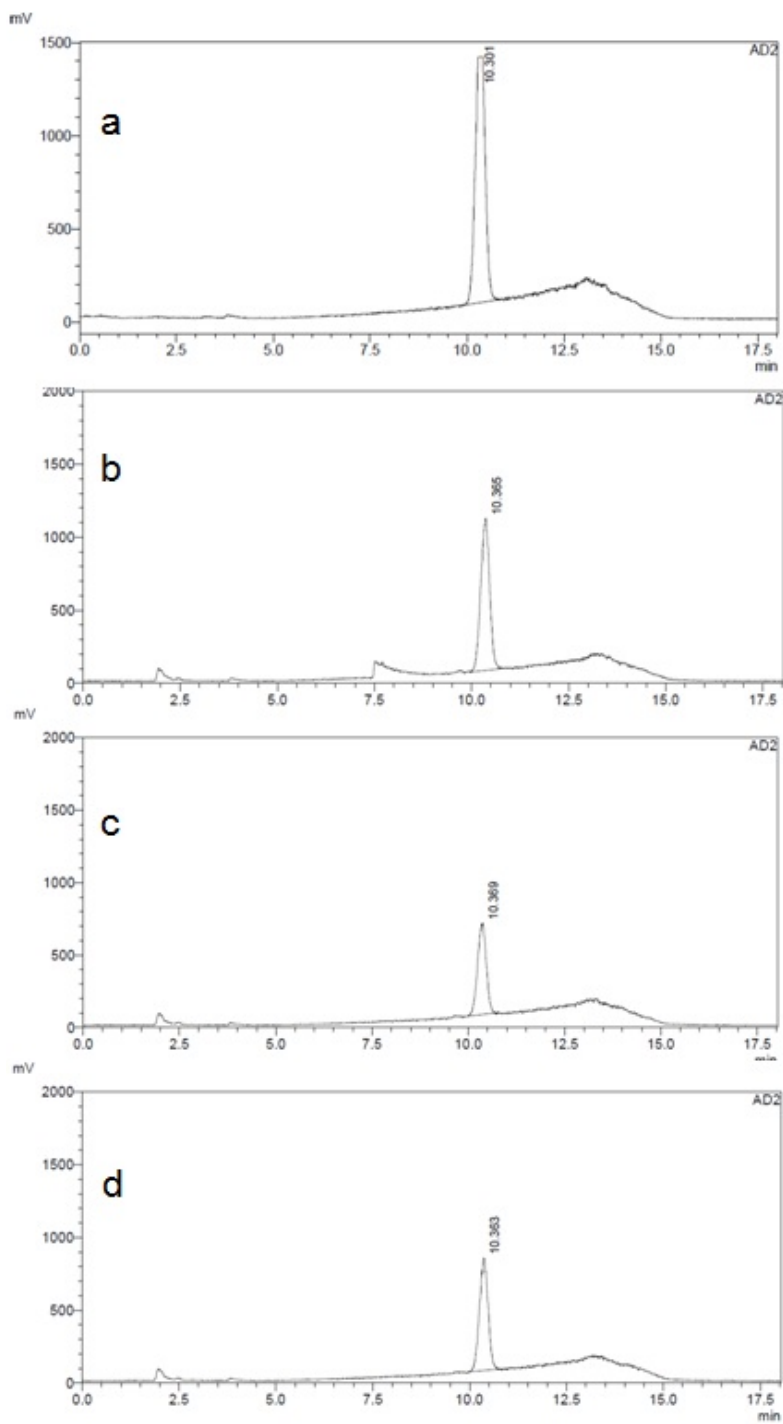

Supplementary Figure 3

Supplement: c4gc02532f2.pdf [file c4gc02532f2.pdf]

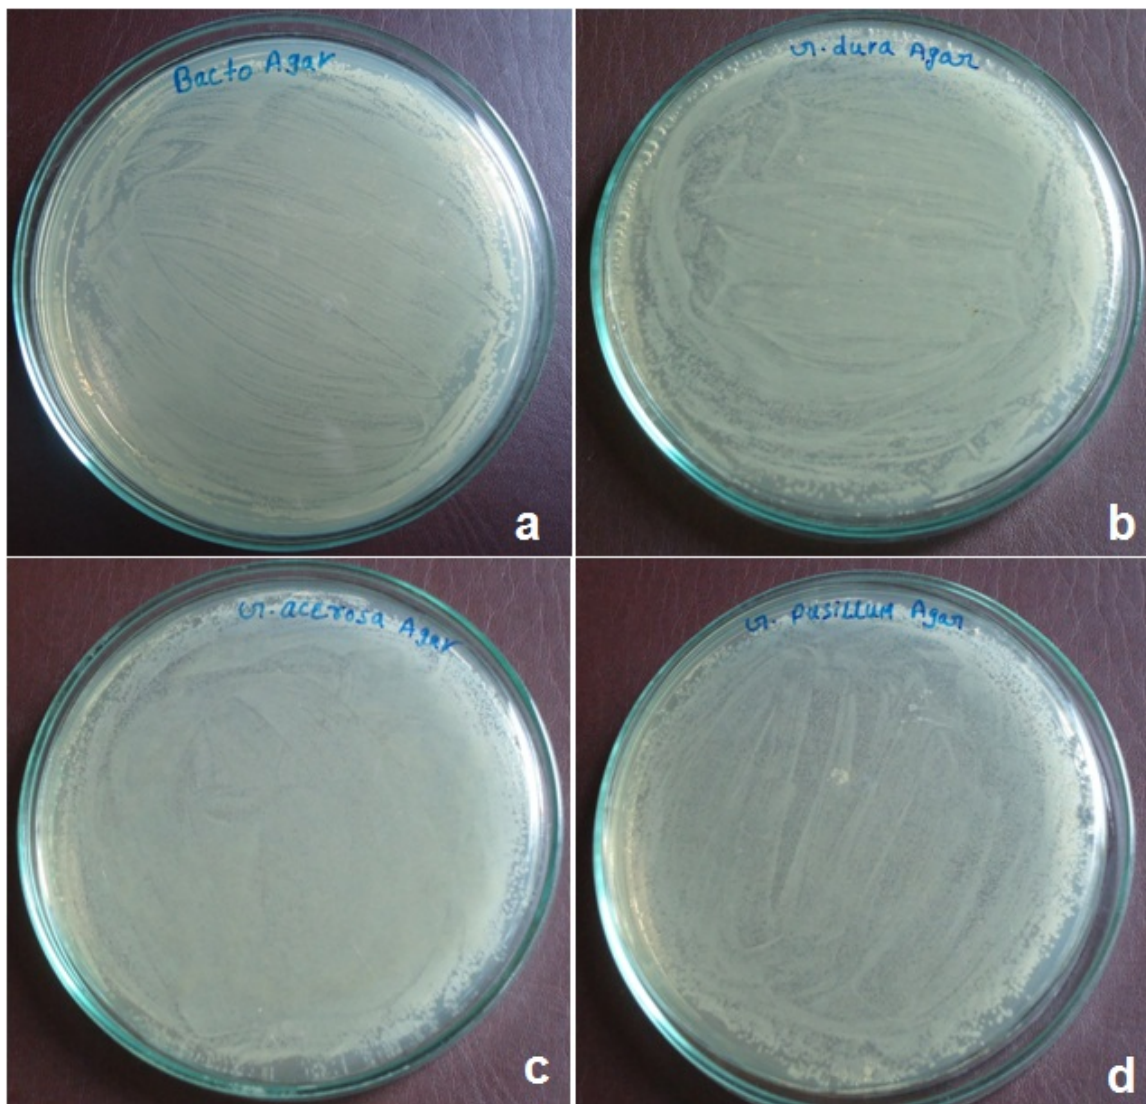

**Supplementary Fig. 2**

Supplement: c4gc02532f5.pdf [file c4gc02532f5.pdf]
